# Supplementary material for: Molecular Insights into Salinity Responsiveness in Contrasting Genotypes of Rice at the Seedling Stage
Source: MDPI journal article supplement (doi:10.3390/ijms23031624), 2022-01-30
Supplement: s1 [file s1]

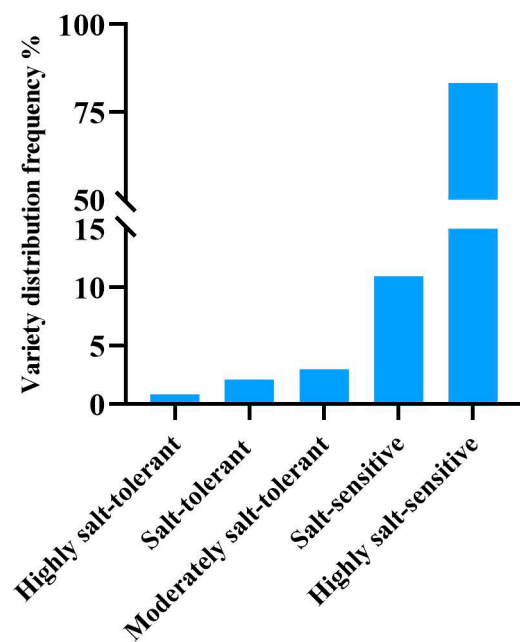

**Figure S1** Percentage of different rice genotypes under salinity stress based on the relative damage rate parameter

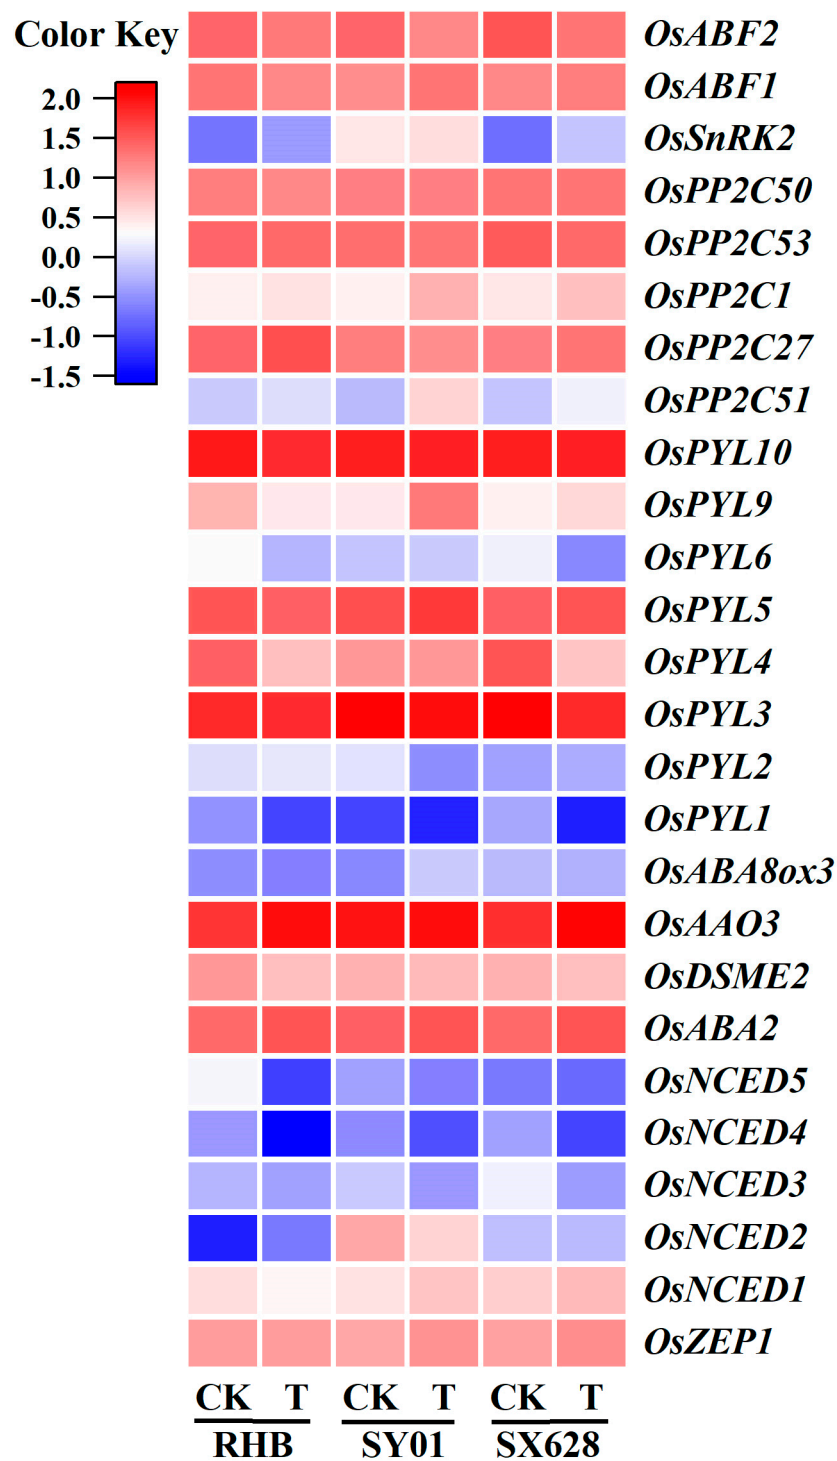

**Figure S2** Heatmap of hormone-related genes differentially expressed under control and salinity stress

Table S1 Rankings of genotypes for their salt tolerance

| NO. | Variety                | Seedling<br>rate-CK(%) | Seedling rate-<br>150mM NaCl(%) | Relative<br>damaging rate(%) | Salt tolerance           |
|-----|------------------------|------------------------|---------------------------------|------------------------------|--------------------------|
| 1   | Sanxiang628            | 97.78                  | 92.22                           | 5.69                         | Highly salt-tolerant     |
| 2   | IAPAR9(W27)            | 98                     | 87.22                           | 11                           | Highly salt-tolerant     |
| 3   | R386                   | 95                     | 75                              | 21.05                        | salt-tolerant            |
| 4   | Guiyu12                | 100                    | 78.9                            | 21.1                         | salt-tolerant            |
| 5   | Azucena                | 95.56                  | 74.43                           | 22.11                        | salt-tolerant            |
| 6   | YL04                   | 100                    | 60                              | 40                           | salt-tolerant            |
| 7   | Nanfangheinuo          | 100                    | 60                              | 40                           | salt-tolerant            |
| 8   | WD1790B                | 100                    | 57.5                            | 42.5                         | Moderately salt-tolerant |
| 9   | 106B                   | 97.78                  | 55.56                           | 43.18                        | Moderately salt-tolerant |
| 10  | ZZ-153                 | 95                     | 47.5                            | 50                           | Moderately salt-tolerant |
| 11  | Meinianxian            | 97.50                  | 45                              | 53.85                        | Moderately salt-tolerant |
| 12  | Thailand xiaoxiangzhan | 100                    | 45.00                           | 55                           | Moderately salt-tolerant |
| 13  | SY01                   | 93.33                  | 40                              | 57.14                        | Moderately salt-tolerant |
| 14  | T165                   | 95                     | 40                              | 57.89                        | Moderately salt-tolerant |
| 15  | Zhong4188(W3)          | 98.9                   | 34.44                           | 65.18                        | salt-sensitive           |
| 16  | R778                   | 97.50                  | 32.50                           | 66.67                        | salt-sensitive           |
| 17  | Huahang31              | 100                    | 32.5                            | 67.5                         | salt-sensitive           |
| 18  | WT17530A               | 95                     | 30                              | 68.42                        | salt-sensitive           |
| 19  | WD18259A               | 92.5                   | 27.5                            | 70.27                        | salt-sensitive           |
| 20  | Guangyouzhan           | 97.5                   | 27.5                            | 71.79                        | salt-sensitive           |
| 21  | Xinhuangzhan           | 100                    | 27.5                            | 72.5                         | salt-sensitive           |
| 22  | Hom Mali               | 100                    | 27.5                            | 72.5                         | salt-sensitive           |
| 23  | Makan Youzhan          | 100                    | 27.50                           | 72.50                        | salt-sensitive           |
| 24  | Batai Xiangzhan        | 100                    | 27.5                            | 72.5                         | salt-sensitive           |
| 25  | Yuebiao5               | 95                     | 25                              | 73.68                        | salt-sensitive           |
| 26  | C2                     | 97.50                  | 25                              | 74.36                        | salt-sensitive           |
| 27  | Yunlu108               | 97.5                   | 25                              | 74.36                        | salt-sensitive           |
| 28  | ZZ-157                 | 100                    | 25                              | 75                           | salt-sensitive           |
| 29  | Zhongguangxiang 1      | 97.5                   | 22.5                            | 76.92                        | salt-sensitive           |
| 30  | ZZ-176                 | 97.50                  | 22.50                           | 76.92                        | salt-sensitive           |
| 31  | Meixiangzhan 2         | 100                    | 22.5                            | 77.5                         | salt-sensitive           |
| 32  | ZZ-93                  | 100                    | 22.50                           | 77.50                        | salt-sensitive           |
| 33  | R481                   | 98.89                  | 22.22                           | 77.53                        | salt-sensitive           |
| 34  | ZZ-26                  | 80.00                  | 17.50                           | 78.13                        | salt-sensitive           |
| 35  | Zhongkexilu5           | 95                     | 20                              | 78.95                        | salt-sensitive           |
| 36  | WD18184A               | 95                     | 20                              | 78.95                        | salt-sensitive           |
| 37  | Nanxiuruanzhan         | 95                     | 20                              | 78.95                        | salt-sensitive           |
| 38  | RHB                    | 98.9                   | 20                              | 79.8                         | salt-sensitive           |
| 39  | Zaoxinzhan1            | 87.50                  | 17.50                           | 80.00                        | salt-sensitive           |
| 40  | Wenxiangzhan           | 100                    | 20                              | 80                           | salt-sensitive           |

Table S2 Sample sequencing data quality summary in this study.

|    |                |       |       |       |                       |
|----|----------------|-------|-------|-------|-----------------------|
| 41 | IR36           | 90    | 17.5  | 80.56 | Highly salt-sensitive |
| 42 | WD18128A       | 67.5  | 12.5  | 81.48 | Highly salt-sensitive |
| 43 | Minghui3301    | 97.50 | 17.50 | 82.05 | Highly salt-sensitive |
| 44 | G525           | 100   | 17.5  | 82.5  | Highly salt-sensitive |
| 45 | Guiyefeng      | 100   | 17.5  | 82.5  | Highly salt-sensitive |
| 46 | zz-145         | 100   | 17.5  | 82.5  | Highly salt-sensitive |
| 47 | ZH-01          | 90    | 15    | 83.33 | Highly salt-sensitive |
| 48 | ZZ-118         | 95.00 | 15.00 | 84.21 | Highly salt-sensitive |
| 49 | WT17533A       | 80    | 12.5  | 84.38 | Highly salt-sensitive |
| 50 | ZZ-86          | 82.50 | 12.50 | 84.85 | Highly salt-sensitive |
| 51 | WD18378A       | 97.78 | 14.44 | 85.23 | Highly salt-sensitive |
| 52 | WT18913A       | 90    | 12.5  | 86.11 | Highly salt-sensitive |
| 53 | ZZ-133         | 92.50 | 12.50 | 86.49 | Highly salt-sensitive |
| 54 | ZZ-84          | 97.50 | 12.50 | 87.18 | Highly salt-sensitive |
| 55 | Nongxiang32    | 100   | 12.5  | 87.5  | Highly salt-sensitive |
| 56 | WT17407A       | 87.5  | 10    | 88.57 | Highly salt-sensitive |
| 57 | WD18381A       | 92.5  | 10    | 89.2  | Highly salt-sensitive |
| 58 | WD18158B       | 95    | 10    | 89.47 | Highly salt-sensitive |
| 59 | WT18903A       | 97.5  | 10    | 89.74 | Highly salt-sensitive |
| 60 | ZZ-32          | 97.50 | 10    | 89.74 | Highly salt-sensitive |
| 61 | Nanjingzhan    | 100   | 10    | 90    | Highly salt-sensitive |
| 62 | ZZ-69          | 97.50 | 7.50  | 92.31 | Highly salt-sensitive |
| 63 | WD17106A       | 97.5  | 7.5   | 92.31 | Highly salt-sensitive |
| 64 | GZ492          | 100   | 7.5   | 92.5  | Highly salt-sensitive |
| 65 | WD17113A       | 100   | 7.5   | 92.5  | Highly salt-sensitive |
| 66 | Wushanxiuzhan  | 100   | 7.5   | 92.5  | Highly salt-sensitive |
| 67 | Zhenxiang      | 98.9  | 5.6   | 94.3  | Highly salt-sensitive |
| 68 | B1(292B)       | 97.5  | 5     | 94.87 | Highly salt-sensitive |
| 69 | R134           | 100   | 5     | 95    | Highly salt-sensitive |
| 70 | Yuefengxinzhan | 100   | 5     | 95    | Highly salt-sensitive |
| 71 | D110           | 100   | 5     | 95.00 | Highly salt-sensitive |
| 72 | D188           | 100   | 5     | 95    | Highly salt-sensitive |
| 73 | Xinxiangzhan   | 100   | 5     | 95    | Highly salt-sensitive |
| 74 | ZZ-182         | 100   | 5     | 95.00 | Highly salt-sensitive |
| 75 | ZZ-35          | 100   | 5     | 95.00 | Highly salt-sensitive |
| 76 | Yueyousimiao   | 100   | 5     | 95    | Highly salt-sensitive |
| 77 | ZZ-53          | 100   | 5     | 95.00 | Highly salt-sensitive |
| 78 | R1173          | 100   | 5     | 95    | Highly salt-sensitive |
| 79 | D94            | 100   | 3.33  | 96.67 | Highly salt-sensitive |
| 80 | Xiangya        | 82.5  | 2.5   | 96.97 | Highly salt-sensitive |
| 81 | D143           | 90    | 2.5   | 97.22 | Highly salt-sensitive |
| 82 | ZZ-19          | 97.50 | 2.50  | 97.44 | Highly salt-sensitive |
| 83 | ZZ-74          | 97.50 | 2.50  | 97.44 | Highly salt-sensitive |
| 84 | WD18382A       | 97.5  | 2.5   | 97.44 | Highly salt-sensitive |

|     |                          |       |      |       |                       |
|-----|--------------------------|-------|------|-------|-----------------------|
| 85  | Yuete13                  | 100   | 2.5  | 97.5  | Highly salt-sensitive |
| 86  | Minghui63                | 100   | 2.5  | 97.5  | Highly salt-sensitive |
| 87  | ZH-02                    | 100   | 2.5  | 97.5  | Highly salt-sensitive |
| 88  | B176                     | 100   | 2.50 | 97.50 | Highly salt-sensitive |
| 89  | DUS baohuhang            | 100   | 2.5  | 97.5  | Highly salt-sensitive |
| 90  | ZZ-273                   | 100   | 2.50 | 97.50 | Highly salt-sensitive |
| 91  | Yuxiangyouzhan           | 100   | 2.5  | 97.5  | Highly salt-sensitive |
| 92  | WD1791B                  | 97.78 | 2.22 | 97.73 | Highly salt-sensitive |
| 93  | Chuanqi                  | 94.44 | 0    | 100   | Highly salt-sensitive |
| 94  | R900                     | 95    | 0    | 100   | Highly salt-sensitive |
| 95  | 9311                     | 100   | 0    | 100   | Highly salt-sensitive |
| 96  | Hua15                    | 98.9  | 0    | 100   | Highly salt-sensitive |
| 97  | Huazhang                 | 87.5  | 0    | 100   | Highly salt-sensitive |
| 98  | RH3B                     | 92.5  | 0    | 100   | Highly salt-sensitive |
| 99  | R135                     | 100   | 0    | 100   | Highly salt-sensitive |
| 100 | Youhui168                | 100   | 0    | 100   | Highly salt-sensitive |
| 101 | Youhui131                | 98.33 | 0    | 100   | Highly salt-sensitive |
| 102 | Zhongkexilu4             | 100   | 0    | 100   | Highly salt-sensitive |
| 103 | Lijiang xintuan heigu    | 65    | 0    | 100   | Highly salt-sensitive |
| 104 | Digu                     | 100   | 0    | 100   | Highly salt-sensitive |
| 105 | TeTep(W1)                | 100   | 0    | 100   | Highly salt-sensitive |
| 106 | Amol3(W2)                | 100   | 0    | 100   | Highly salt-sensitive |
| 107 | TaifengB                 | 77.5  | 0    | 100   | Highly salt-sensitive |
| 108 | Zihui100(W5)             | 95    | 0    | 100   | Highly salt-sensitive |
| 109 | Katy(W6)                 | 93.33 | 0    | 100   | Highly salt-sensitive |
| 110 | IR64(W8)                 | 100   | 0    | 100   | Highly salt-sensitive |
| 111 | NanyangZhan(W10)         | 75    | 0    | 100   | Highly salt-sensitive |
| 112 | Basmati370(W11)          | 95    | 0    | 100   | Highly salt-sensitive |
| 113 | IR58025B(W12)            | 97.5  | 0    | 100   | Highly salt-sensitive |
| 114 | Jiangxisimiao(W13)       | 97.50 | 0    | 100   | Highly salt-sensitive |
| 115 | T356                     | 100   | 0    | 100   | Highly salt-sensitive |
| 116 | Chenglongshuijingmi(W20) | 85    | 0    | 100   | Highly salt-sensitive |
| 117 | Lemont(W23)              | 92.5  | 0    | 100   | Highly salt-sensitive |
| 118 | Guang8B                  | 100   | 0    | 100   | Highly salt-sensitive |
| 119 | Huajingxian74            | 100   | 0    | 100   | Highly salt-sensitive |
| 120 | 20151284C                | 80    | 0    | 100   | Highly salt-sensitive |
| 121 | G510                     | 90    | 0    | 100   | Highly salt-sensitive |
| 122 | YexiangB                 | 97.5  | 0    | 100   | Highly salt-sensitive |
| 123 | G569                     | 73.33 | 0    | 100   | Highly salt-sensitive |
| 124 | GZ484                    | 100   | 0    | 100   | Highly salt-sensitive |
| 125 | GZ493                    | 87.5  | 0    | 100   | Highly salt-sensitive |
| 126 | B2                       | 97.5  | 0    | 100   | Highly salt-sensitive |
| 127 | WD17117A                 | 95    | 0    | 100   | Highly salt-sensitive |
| 128 | WD17118A                 | 100   | 0    | 100   | Highly salt-sensitive |

|     |                   |       |   |     |                       |
|-----|-------------------|-------|---|-----|-----------------------|
| 129 | WD17120A          | 100   | 0 | 100 | Highly salt-sensitive |
| 130 | WD17124A          | 97.5  | 0 | 100 | Highly salt-sensitive |
| 131 | WD18201A          | 96.67 | 0 | 100 | Highly salt-sensitive |
| 132 | WD18299A          | 100   | 0 | 100 | Highly salt-sensitive |
| 133 | WD18313A          | 100   | 0 | 100 | Highly salt-sensitive |
| 134 | WD18334A          | 97.5  | 0 | 100 | Highly salt-sensitive |
| 135 | WD18339A          | 95    | 0 | 100 | Highly salt-sensitive |
| 136 | WD18355A          | 100   | 0 | 100 | Highly salt-sensitive |
| 137 | WD18360A          | 100   | 0 | 100 | Highly salt-sensitive |
| 138 | WD18423A          | 95    | 0 | 100 | Highly salt-sensitive |
| 139 | WD18450A          | 97.5  | 0 | 100 | Highly salt-sensitive |
| 140 | WD184538A         | 85.00 | 0 | 100 | Highly salt-sensitive |
| 141 | WD18466A          | 88.33 | 0 | 100 | Highly salt-sensitive |
| 142 | WD1868A           | 95.00 | 0 | 100 | Highly salt-sensitive |
| 143 | WD18277A          | 92.50 | 0 | 100 | Highly salt-sensitive |
| 144 | WT17250A          | 87.5  | 0 | 100 | Highly salt-sensitive |
| 145 | WT17397A          | 100   | 0 | 100 | Highly salt-sensitive |
| 146 | Huanghuazhan      | 95.00 | 0 | 100 | Highly salt-sensitive |
| 147 | WT17538A          | 90    | 0 | 100 | Highly salt-sensitive |
| 148 | WT17545A          | 95    | 0 | 100 | Highly salt-sensitive |
| 149 | WD18153A          | 90    | 0 | 100 | Highly salt-sensitive |
| 150 | Jingnongsimiao    | 100   | 0 | 100 | Highly salt-sensitive |
| 151 | Cungunuo          | 95    | 0 | 100 | Highly salt-sensitive |
| 152 | Kemainuo          | 92.50 | 0 | 100 | Highly salt-sensitive |
| 153 | Huangguangyouzhan | 97.5  | 0 | 100 | Highly salt-sensitive |
| 154 | Lunhui01          | 95    | 0 | 100 | Highly salt-sensitive |
| 155 | Aixiuzhan         | 90    | 0 | 100 | Highly salt-sensitive |
| 156 | Zhongjuanxian     | 97.50 | 0 | 100 | Highly salt-sensitive |
| 157 | Zhengchengsimiao  | 95    | 0 | 100 | Highly salt-sensitive |
| 158 | Zhudao            | 90    | 0 | 100 | Highly salt-sensitive |
| 159 | Qiyezhan          | 82.5  | 0 | 100 | Highly salt-sensitive |
| 160 | B111              | 100   | 0 | 100 | Highly salt-sensitive |
| 161 | Hefengsimiao      | 100   | 0 | 100 | Highly salt-sensitive |
| 162 | Huanglisimiao     | 97.5  | 0 | 100 | Highly salt-sensitive |
| 163 | Huangsizhan       | 90    | 0 | 100 | Highly salt-sensitive |
| 164 | Huangxiuzhan      | 92.5  | 0 | 100 | Highly salt-sensitive |
| 165 | Huangyinzhan      | 100   | 0 | 100 | Highly salt-sensitive |
| 166 | lvyuanzhan        | 100   | 0 | 100 | Highly salt-sensitive |
| 167 | Nanguizhan        | 100   | 0 | 100 | Highly salt-sensitive |
| 168 | B174              | 100   | 0 | 100 | Highly salt-sensitive |
| 169 | Nanyouzhan        | 100   | 0 | 100 | Highly salt-sensitive |
| 170 | Wushansimiao      | 97.50 | 0 | 100 | Highly salt-sensitive |
| 171 | Yuehesimiao       | 95    | 0 | 100 | Highly salt-sensitive |
| 172 | Yuehuasimiao      | 97.5  | 0 | 100 | Highly salt-sensitive |

|     |                  |       |   |     |                       |
|-----|------------------|-------|---|-----|-----------------------|
| 173 | Huangruanzhan    | 97.5  | 0 | 100 | Highly salt-sensitive |
| 174 | Yuenongsimiao    | 92.5  | 0 | 100 | Highly salt-sensitive |
| 175 | D25              | 100   | 0 | 100 | Highly salt-sensitive |
| 176 | D53              | 97.5  | 0 | 100 | Highly salt-sensitive |
| 177 | D130             | 99    | 0 | 100 | Highly salt-sensitive |
| 178 | D140             | 97.78 | 0 | 100 | Highly salt-sensitive |
| 179 | D141             | 65.00 | 0 | 100 | Highly salt-sensitive |
| 180 | D142             | 95    | 0 | 100 | Highly salt-sensitive |
| 181 | D180             | 100   | 0 | 100 | Highly salt-sensitive |
| 182 | D191             | 100   | 0 | 100 | Highly salt-sensitive |
| 183 | D194             | 95    | 0 | 100 | Highly salt-sensitive |
| 184 | D213             | 92.5  | 0 | 100 | Highly salt-sensitive |
| 185 | D215             | 97.5  | 0 | 100 | Highly salt-sensitive |
| 186 | D216             | 82.50 | 0 | 100 | Highly salt-sensitive |
| 187 | P79              | 92.50 | 0 | 100 | Highly salt-sensitive |
| 188 | D221             | 80.00 | 0 | 100 | Highly salt-sensitive |
| 189 | D231             | 100   | 0 | 100 | Highly salt-sensitive |
| 190 | D279             | 100   | 0 | 100 | Highly salt-sensitive |
| 191 | D289             | 96.67 | 0 | 100 | Highly salt-sensitive |
| 192 | D301             | 100   | 0 | 100 | Highly salt-sensitive |
| 193 | D302             | 100   | 0 | 100 | Highly salt-sensitive |
| 194 | Taiguoxiangmi    | 100   | 0 | 100 | Highly salt-sensitive |
| 195 | Guixiang3        | 90    | 0 | 100 | Highly salt-sensitive |
| 196 | Guifengxiangzhan | 100   | 0 | 100 | Highly salt-sensitive |
| 197 | ZMZ-42           | 95    | 0 | 100 | Highly salt-sensitive |
| 198 | ZMZ-43           | 97.5  | 0 | 100 | Highly salt-sensitive |
| 199 | 19xiang          | 100   | 0 | 100 | Highly salt-sensitive |
| 200 | ZZ-105           | 95    | 0 | 100 | Highly salt-sensitive |
| 201 | ZZ-106           | 98    | 0 | 100 | Highly salt-sensitive |
| 202 | ZZ-108           | 98    | 0 | 100 | Highly salt-sensitive |
| 203 | ZZ-110           | 100   | 0 | 100 | Highly salt-sensitive |
| 204 | Gufengzhan       | 95    | 0 | 100 | Highly salt-sensitive |
| 205 | ZZ-113           | 100   | 0 | 100 | Highly salt-sensitive |
| 206 | ZZ-121           | 97.50 | 0 | 100 | Highly salt-sensitive |
| 207 | ZZ-126           | 95.00 | 0 | 100 | Highly salt-sensitive |
| 208 | ZZ-128           | 92.50 | 0 | 100 | Highly salt-sensitive |
| 209 | ZZ-129           | 97.50 | 0 | 100 | Highly salt-sensitive |
| 210 | ZZ-139           | 100   | 0 | 100 | Highly salt-sensitive |
| 211 | ZZ-141           | 100   | 0 | 100 | Highly salt-sensitive |
| 212 | ZZ-146           | 100   | 0 | 100 | Highly salt-sensitive |
| 213 | ZZ-164           | 100   | 0 | 100 | Highly salt-sensitive |
| 214 | ZZ-17            | 52.50 | 0 | 100 | Highly salt-sensitive |
| 215 | ZZ-172           | 100   | 0 | 100 | Highly salt-sensitive |
| 216 | ZZ-177           | 97.50 | 0 | 100 | Highly salt-sensitive |

|     |           |       |   |     |                       |
|-----|-----------|-------|---|-----|-----------------------|
| 217 | ZZ-181    | 100   | 0 | 100 | Highly salt-sensitive |
| 218 | ZZ-184    | 92.50 | 0 | 100 | Highly salt-sensitive |
| 219 | ZZ-185    | 100   | 0 | 100 | Highly salt-sensitive |
| 220 | ZZ-24     | 95.00 | 0 | 100 | Highly salt-sensitive |
| 221 | ZZ-27     | 85.00 | 0 | 100 | Highly salt-sensitive |
| 222 | ZZ-36     | 97.50 | 0 | 100 | Highly salt-sensitive |
| 223 | ZZ-37     | 95    | 0 | 100 | Highly salt-sensitive |
| 224 | ZZ-38     | 100   | 0 | 100 | Highly salt-sensitive |
| 225 | ZZ-46     | 97.50 | 0 | 100 | Highly salt-sensitive |
| 226 | Dingfeng  | 97.5  | 0 | 100 | Highly salt-sensitive |
| 227 | Huahang48 | 87.5  | 0 | 100 | Highly salt-sensitive |
| 228 | Liu Chang | 87.5  | 0 | 100 | Highly salt-sensitive |
| 229 | Guiyefeng | 97.5  | 0 | 100 | Highly salt-sensitive |
| 230 | ZZ-61     | 97.50 | 0 | 100 | Highly salt-sensitive |
| 231 | R1179     | 100   | 0 | 100 | Highly salt-sensitive |
| 232 | 20S-ZZ-64 | 92.50 | 0 | 100 | Highly salt-sensitive |
| 233 | 20S-ZZ-66 | 97.50 | 0 | 100 | Highly salt-sensitive |
| 234 | 20S-ZZ-77 | 100   | 0 | 100 | Highly salt-sensitive |
| 235 | 20S-ZZ-79 | 95    | 0 | 100 | Highly salt-sensitive |
| 236 | 20S-ZZ-8  | 95    | 0 | 100 | Highly salt-sensitive |
| 237 | 20S-ZZ-85 | 100   | 0 | 100 | Highly salt-sensitive |
| 238 | 20S-ZZ-91 | 97.50 | 0 | 100 | Highly salt-sensitive |

| Sample    | Raw reads | Raw bases  | Clean reads | Clean bases | Error rate | Q20   | Q30   | GC content |
|-----------|-----------|------------|-------------|-------------|------------|-------|-------|------------|
| RHB_CK1   | 56974394  | 8603133494 | 56128488    | 8301738277  | 0.0261     | 97.49 | 93.25 | 51.62      |
| RHB_CK2   | 42966458  | 6487935158 | 42521442    | 6311929069  | 0.0249     | 98.06 | 94.28 | 50.1       |
| RHB_CK3   | 48940690  | 7390044190 | 48373142    | 7175727170  | 0.0256     | 97.77 | 93.65 | 50.89      |
| RHB_T1    | 54679726  | 8256638626 | 53784736    | 7908648545  | 0.0262     | 97.41 | 93.13 | 51.17      |
| RHB_T2    | 53035220  | 8008318220 | 52339176    | 7551761632  | 0.0254     | 97.78 | 93.89 | 51.85      |
| RHB_T3    | 58291492  | 8802015292 | 57498198    | 8458084998  | 0.0256     | 97.65 | 93.66 | 51.19      |
| SY01_CK1  | 54214254  | 8186352354 | 53480298    | 7893063446  | 0.026      | 97.54 | 93.34 | 51.6       |
| SY01_CK2  | 58874912  | 8890111712 | 58194586    | 8611580894  | 0.0256     | 97.7  | 93.71 | 51.37      |
| SY01_CK3  | 58866948  | 8888909148 | 58220644    | 8600466378  | 0.0254     | 97.8  | 93.89 | 51.77      |
| SY01_T1   | 46886092  | 7079799892 | 46179696    | 6826531691  | 0.0259     | 97.54 | 93.42 | 51.61      |
| SY01_T2   | 51731316  | 7811428716 | 51018206    | 7498799674  | 0.0261     | 97.48 | 93.19 | 51.87      |
| SY01_T3   | 48141076  | 7269302476 | 47507460    | 7013608887  | 0.0259     | 97.58 | 93.45 | 52.01      |
| SX628_CK1 | 50485078  | 7623246778 | 49723826    | 7274294900  | 0.0262     | 97.45 | 93.13 | 50.16      |
| SX628_CK2 | 52274096  | 7893388496 | 51493102    | 7528146937  | 0.0256     | 97.69 | 93.66 | 50.43      |
| SX628_CK3 | 50350176  | 7602876576 | 49578014    | 7283278497  | 0.0264     | 97.37 | 92.95 | 50.7       |
| SX628_T1  | 52870194  | 7983399294 | 52242570    | 7726800481  | 0.0256     | 97.67 | 93.63 | 52.16      |
| SX628_T2  | 61031390  | 9215739890 | 60285742    | 8934331645  | 0.0258     | 97.6  | 93.48 | 51.22      |
| SX628_T3  | 47020366  | 7100075266 | 46354740    | 6835070963  | 0.0262     | 97.44 | 93.1  | 51.25      |



Table S3 Sample sequencing data mapped summary in this study.

| Sample    | Total reads | Total mapped     | Multiple mapped | Uniquely mapped  |
|-----------|-------------|------------------|-----------------|------------------|
| RHB_CK1   | 56128488    | 50383540(89.76%) | 7978528(14.21%) | 42405012(75.55%) |
| RHB_CK2   | 42521442    | 38319757(90.12%) | 2480796(5.83%)  | 35838961(84.28%) |
| RHB_CK3   | 48373142    | 43349977(89.62%) | 2176451(4.5%)   | 41173526(85.12%) |
| RHB_T1    | 53784736    | 49036699(91.17%) | 4147016(7.71%)  | 44889683(83.46%) |
| RHB_T2    | 52339176    | 47711363(91.16%) | 5178925(9.89%)  | 42532438(81.26%) |
| RHB_T3    | 57498198    | 52482079(91.28%) | 3374772(5.87%)  | 49107307(85.41%) |
| SY01_CK1  | 53480298    | 49124550(91.86%) | 3744720(7.0%)   | 45379830(84.85%) |
| SY01_CK2  | 58194586    | 53230492(91.47%) | 3071089(5.28%)  | 50159403(86.19%) |
| SY01_CK3  | 58220644    | 53561783(92.0%)  | 3036681(5.22%)  | 50525102(86.78%) |
| SY01_T1   | 46179696    | 42515390(92.07%) | 2931144(6.35%)  | 39584246(85.72%) |
| SY01_T2   | 51018206    | 47257628(92.63%) | 3534745(6.93%)  | 43722883(85.7%)  |
| SY01_T3   | 47507460    | 43609538(91.8%)  | 3162018(6.66%)  | 40447520(85.14%) |
| SX628_CK1 | 49723826    | 45545296(91.6%)  | 2677462(5.38%)  | 42867834(86.21%) |
| SX628_CK2 | 51493102    | 47603877(92.45%) | 4508497(8.76%)  | 43095380(83.69%) |
| SX628_CK3 | 49578014    | 45471336(91.72%) | 2853518(5.76%)  | 42617818(85.96%) |
| SX628_T1  | 52242570    | 48384171(92.61%) | 2665274(5.1%)   | 45718897(87.51%) |
| SX628_T2  | 60285742    | 55926843(92.77%) | 3444604(5.71%)  | 52482239(87.06%) |
| SX628_T3  | 46354740    | 42997470(92.76%) | 3005952(6.48%)  | 39991518(86.27%) |

Table S4 Different type of transcripts with class code were detected using Gffcompare

| Class_code | Description                                                                                             | Number |
|------------|---------------------------------------------------------------------------------------------------------|--------|
| =          | Complete match of intron chain                                                                          | 42029  |
| i          | Transfrag falling entirely within a reference intron                                                    | 212    |
| j          | Potentially novel isoform (fragment):at least one splice junction is shared with a reference transcript | 25065  |
| o          | Generic exonic overlap with a reference transcript                                                      | 3672   |
| u          | Unknown, intergenic transcript                                                                          | 5443   |
| x          | Exonic overlap with reference on the opposite strand                                                    | 1911   |

Table S5 Alternative splicing(AS) events in the transcriptome of different samples

| Sample name | SE    | RI   | A5SS | A3SS | MXE | Total |
|-------------|-------|------|------|------|-----|-------|
| RHB_CK1     | 11628 | 1639 | 2093 | 3714 | 800 | 19874 |

|           |       |      |      |      |      |       |
|-----------|-------|------|------|------|------|-------|
| RHB_CK2   | 11416 | 1564 | 2017 | 3534 | 760  | 19291 |
| RHB_CK3   | 11669 | 1652 | 2112 | 3707 | 817  | 19957 |
| RHB_T1    | 12615 | 1932 | 2324 | 3963 | 989  | 21823 |
| RHB_T2    | 12558 | 1873 | 2285 | 3921 | 968  | 21605 |
| RHB_T3    | 12612 | 1958 | 2320 | 3957 | 987  | 21834 |
| SY01_CK1  | 11730 | 1987 | 2297 | 3939 | 895  | 20848 |
| SY01_CK2  | 11873 | 2015 | 2307 | 3985 | 890  | 21070 |
| SY01_CK3  | 11731 | 1975 | 2295 | 3936 | 892  | 20829 |
| SY01_T1   | 12746 | 2053 | 2389 | 4014 | 1027 | 22229 |
| SY01_T2   | 12748 | 2082 | 2378 | 4023 | 1041 | 22272 |
| SY01_T3   | 12802 | 2084 | 2391 | 4029 | 1023 | 22329 |
| SX628_CK1 | 12157 | 2101 | 2399 | 4054 | 947  | 21658 |
| SX628_CK2 | 12102 | 2018 | 2355 | 3976 | 936  | 21387 |
| SX628_CK3 | 12149 | 2056 | 2389 | 4030 | 940  | 21564 |
| SX628_T1  | 13016 | 2141 | 2437 | 4075 | 1088 | 22757 |
| SX628_T2  | 13013 | 2162 | 2457 | 4085 | 1083 | 22800 |
| SX628_T3  | 13075 | 2135 | 2454 | 4091 | 1099 | 22854 |

SE: Skipped exon; RI: Retained intron; A5SS: Alternative 5' splice site; A3SS: Alternative 3' splice site; MXE: Mutually exclusive exons.

Table S6 19 upregulated genes were identified in starch and sucrose metabolism pathway under control and salinity treatments

| Accession<br>Number | Gene<br>Name     | RHB CK vs T |          | SY01 CK vs T |          | SX628 CK vs T |          | Description                                                     |
|---------------------|------------------|-------------|----------|--------------|----------|---------------|----------|-----------------------------------------------------------------|
|                     |                  | Log2FC      | Padjust  | Log2FC       | Padjust  | Log2FC        | Padjust  |                                                                 |
| <i>Os01g0190400</i> | <i>OsH XK8</i>   | 1.36        | 1.05E-05 | 1.23         | 0.000461 | 2.14          | 0.000114 | Phosphotransferase                                              |
| <i>Os05g0518600</i> | <i>OsTPS1</i>    | 1.01        | 1.11E-07 | 1.50         | 8.22E-06 | 1.51          | 2.15E-15 | Trehalose-6-phosphate synthase                                  |
| <i>Os04g0513100</i> | <i>OsBGLU14</i>  | 3.86        | 2.29E-09 | 3.68         | 2.69E-07 | 4.33          | 1.78E-12 | Monolignol beta-glucoside homologue without catalytic acid/base |
| <i>Os03g0340500</i> | <i>OsSUS4</i>    | 1.46        | 1.85E-08 | 1.22         | 4.04E-05 | 2.94          | 1.9E-89  | Sucrose synthase                                                |
| <i>Os05g0580000</i> | <i>OsAGPL1</i>   | 1.65        | 3.59E-08 | 2.38         | 4.06E-25 | 2.82          | 1.45E-12 | Glucose-1-phosphate adenylyltransferase                         |
| <i>Os09g0298200</i> | <i>OsAGPS1</i>   | 1.56        | 3.39E-10 | 1.43         | 2.49E-15 | 2.59          | 5.37E-33 | Glucose-1-phosphate adenylyltransferase                         |
| <i>Os06g0160700</i> | <i>OsSSI</i>     | 2.28        | 1.04E-17 | 1.75         | 7.46E-19 | 2.69          | 2.96E-20 | Soluble starch synthase 1, chloroplastic/amyloplastic           |
| <i>Os06g0229800</i> | <i>OsSSIIa</i>   | 2.86        | 4.58E-07 | 4.27         | 2.8E-16  | 4.08          | 7.48E-18 | Starch synthase, chloroplastic/amyloplastic                     |
| <i>Os07g0412100</i> | <i>OsGBSSII;</i> | 1.64        | 2.83E-20 | 2.00         | 1.22E-25 | 1.95          | 1.8E-30  | Starch synthase, chloroplastic/amyloplastic                     |
| <i>Os01g0851700</i> | <i>OsPho2</i>    | 2.36        | 9.53E-16 | 1.97         | 1.73E-18 | 3.40          | 1.43E-42 | Alpha-1,4 glucan phosphorylase                                  |
| <i>Os03g0758100</i> | <i>OsPho1</i>    | 2.73        | 4.65E-31 | 3.01         | 1.63E-61 | 4.11          | 9.64E-36 | Alpha-1,4 glucan phosphorylase                                  |
| <i>Os07g0627000</i> | <i>OsDPE1</i>    | 1.65        | 2.7E-16  | 1.45         | 8.22E-09 | 1.69          | 1.33E-12 | 4-alpha-glucanotransferase                                      |
| <i>Os02g0528200</i> | <i>OsBEIIb</i>   | 1.81        | 3.57E-06 | 1.74         | 1.53E-13 | 3.53          | 3.56E-15 | Starch branching enzyme 3                                       |
| <i>Os04g0409200</i> | <i>OsBEIIa</i>   | 2.35        | 2.37E-26 | 2.17         | 2.78E-29 | 3.29          | 3.85E-26 | 1,4-alpha-glucan-branching enzyme 2                             |
| <i>Os04g0554000</i> | <i>OsTPP5</i>    | 1.77        | 0.005428 | 3.12         | 1.74E-07 | 1.69          | 0.03599  | Trehalose 6-phosphate phosphatase                               |
| <i>Os09g0469400</i> | <i>OsISA3;</i>   | 2.15        | 3.1E-12  | 2.26         | 6.16E-22 | 2.21          | 1.44E-23 | Glycogen operon protein glgX                                    |
| <i>Os05g0393700</i> | <i>OsISA2</i>    | 1.72        | 3.56E-08 | 1.08         | 0.000406 | 2.78          | 3.69E-48 | Alpha amylase, catalytic domain containing protein              |
| <i>Os08g0520900</i> | <i>OsISA1</i>    | 2.03        | 1.86E-08 | 1.60         | 4.99E-17 | 3.10          | 1.46E-37 | Alpha amylase, catalytic domain containing protein              |
| <i>Os01g0357400</i> | <i>Osamy-c</i>   | 1.32        | 0.009016 | 2.73         | 9.05E-57 | 3.75          | 0.007756 | Alpha-amylase isozyme C                                         |

Table S7 Hormone-related genes differentially expressed under control and salinity stress

| Accession<br>Number | Gene<br>Name   | RHB CK vs T |          | SY01 CK vs T |          | SX628 CK vs T |          | Description                                        |
|---------------------|----------------|-------------|----------|--------------|----------|---------------|----------|----------------------------------------------------|
|                     |                | Log2FC      | Padjust  | Log2FC       | Padjust  | Log2FC        | Padjust  |                                                    |
| <i>Os04g0448900</i> | <i>ZEP1</i>    | 0.26        | 0.375741 | 0.45         | 0.014422 | 0.69          | 0.002159 | Zeaxanthin epoxidase, chloroplastic                |
| <i>Os02g0704000</i> | <i>NCED1</i>   | -0.51       | 0.419290 | 0.61         | 0.279626 | 0.89          | 0.094703 | 9-cis-epoxycarotenoid dioxygenase                  |
| <i>Os12g0435200</i> | <i>NCED2</i>   | 2.49        | 0.214692 | -1.19        | 0.006452 | 0.06          | 0.977790 | 9-cis-epoxycarotenoid dioxygenase                  |
| <i>Os03g0645900</i> | <i>NCED3</i>   | -0.25       | 0.820077 | -1.27        | 0.197055 | -1.71         | 0.019469 | 9-cis-epoxycarotenoid dioxygenase                  |
| <i>Os07g0154100</i> | <i>NCED4</i>   | -3.54       | 0.086338 | -1.53        | 0.381584 | -1.98         | 0.345497 | 9-cis-epoxycarotenoid dioxygenase                  |
| <i>Os12g0617400</i> | <i>NCED5</i>   | -4.11       | 0.005574 | -0.83        | 0.664234 | -0.09         | 0.956351 | 9-cis-epoxycarotenoid dioxygenase                  |
| <i>Os03g0810800</i> | <i>ABA2</i>    | 0.65        | 0.023344 | 0.22         | 0.299843 | 0.73          | 0.000355 | Xanthoxin dehydrogenase                            |
| <i>Os03g0125100</i> | <i>DSME2</i>   | -0.74       | 0.104410 | -0.27        | 0.553333 | -0.16         | 0.667089 | $\beta$ -Carotene Hydroxylase                      |
| <i>Os03g0790900</i> | <i>AAO3</i>    | 1.10        | 0.005164 | 0.19         | 0.450732 | 1.27          | 0.000591 | aldehyde oxidase                                   |
| <i>Os09g0457100</i> | <i>ABA8ox3</i> | -0.03       | 0.987742 | 1.71         | 0.055630 | 0.02          | 0.986591 | Absciscic acid 8'-hydroxylase 3                    |
| <i>Os01g0827800</i> | <i>PYL1</i>    | -1.65       | 1.000000 | -0.66        | 1.000000 | -2.78         | 1.000000 | ABA receptor 8                                     |
| <i>Os02g0226801</i> | <i>PYL2</i>    | 0.45        | 0.790862 | -1.94        | 0.273728 | 0.50          | 0.802816 | ABA receptor 10                                    |
| <i>Os02g0255500</i> | <i>PYL3</i>    | -0.03       | 0.951982 | -0.32        | 0.186817 | -0.87         | 0.006403 | ABA receptor 2                                     |
| <i>Os03g0297600</i> | <i>PYL4</i>    | -1.95       | 0.000073 | -0.04        | 0.948409 | -2.43         | 0.000000 | ABA receptor 6                                     |
| <i>Os05g0213500</i> | <i>PYL5</i>    | -0.17       | 0.525032 | 0.33         | 0.128173 | 0.19          | 0.391163 | rice orthologue of the ABA receptor                |
| <i>Os05g0473000</i> | <i>PYL6</i>    | -1.59       | 0.197725 | 0.11         | 0.959968 | -2.34         | 0.104892 | pyrabactin resistance-like absciscic acid receptor |
| <i>Os06g0562200</i> | <i>PYL9</i>    | -1.14       | 0.111957 | 2.82         | 0.000000 | 0.92          | 0.351498 | ABA receptor 11                                    |
| <i>Os10g0573400</i> | <i>PYL10</i>   | -0.12       | 0.586230 | -0.16        | 0.530212 | 0.14          | 0.633604 | ABA receptor 9                                     |

|                     |               |       |          |       |          |       |          |                                                                                                                        |
|---------------------|---------------|-------|----------|-------|----------|-------|----------|------------------------------------------------------------------------------------------------------------------------|
| <i>Os05g0572700</i> | <i>PP2C51</i> | 0.79  | 0.412249 | 2.74  | 0.000000 | 1.32  | 0.062696 | protein phosphatase 2C clade A protein                                                                                 |
| <i>Os02g0799000</i> | <i>PP2C27</i> | 0.82  | 0.157120 | -0.27 | 0.387424 | 0.60  | 0.002655 | type 2C protein phosphatase                                                                                            |
| <i>Os09g0325700</i> | <i>PP2C1</i>  | 0.56  | 0.236117 | 1.61  | 0.055304 | 1.07  | 0.021210 | Protein Phosphatase 2C                                                                                                 |
| <i>Os05g0592800</i> | <i>PP2C53</i> | -0.09 | 0.734360 | -0.16 | 0.450205 | -0.17 | 0.408179 | clade A type 2C protein phosphatase                                                                                    |
| <i>Os05g0537400</i> | <i>PP2C50</i> | 0.03  | 0.913579 | 0.12  | 0.827967 | 0.08  | 0.762883 | clade A type 2C protein phosphatase                                                                                    |
| <i>Os04g0629300</i> | <i>SnRK2</i>  | 0.90  | 0.410880 | 0.17  | 0.597341 | 2.49  | 0.000309 | Snf2 family protein                                                                                                    |
| <i>Os01g0867300</i> | <i>ABF1</i>   | -0.19 | 0.517333 | 0.73  | 0.013389 | 0.56  | 0.000989 | bZIP transcription factor, Abiotic stress response, ABA signaling, Suppressor of floral transition upon drought stress |
| <i>Os02g0766700</i> | <i>ABF2</i>   | -0.32 | 0.118147 | -0.95 | 0.023628 | -0.63 | 0.005625 | bZIP transcription factor, Regulation of ABA signaling and biosynthesis, Drought resistance                            |

---

Table S8 List of Primers used in this study

| Application | Primer    | Sequence (5'-3')      |
|-------------|-----------|-----------------------|
| qRT-PCR     | OsSUS4-F  | ATGTAAACAAGACCCCAACCA |
| qRT-PCR     | OsSUS4-R  | CAGTGTGCCTCATCTACTGC  |
| qRT-PCR     | OsAGPL1-F | CTTGCGTGAATGTACCATCG  |
| qRT-PCR     | OsAGPL1-R | TACACCAATGGGGACCTTGC  |
| qRT-PCR     | OsBEIIb-F | ATTTGGCAGGATCCATCACAC |
| qRT-PCR     | OsBEIIb-R | AGCATAGACAACGCAGGTTC  |
| qRT-PCR     | OsHAK1-F  | GGCCCAACTCGTCCATCC    |
| qRT-PCR     | OsHAK1-R  | ACGTGATCCCAACCTTGAGC  |
| qRT-PCR     | OsHAK19-F | CAACGCAGCCAAGATAGCAC  |
| qRT-PCR     | OsHAK19-R | GCATCGAGAACAGCACGAAC  |
| qRT-PCR     | OsHAK5-F  | AGACCAACACACGACGGAAC  |
| qRT-PCR     | OsHAK5-R  | ACGTCATTCTACCCGCAAC   |
| qRT-PCR     | OsHAK22-F | ACATACCGGTGGCCATGTCTG |
| qRT-PCR     | OsHAK22-R | GCTCCCTCCGAGACACAAGC  |
